# Supplementary material for: Zirconium mediated total synthesis of crinitol, 9-hydroxyfarnesoic acid, 9-hydroxyfarnesol, 9-hydroxysargaquinone and the selectively-protected aglycone of moritoside and euplexide A
Source: Royal Society of Chemistry journal article supplement (doi:10.1039/b508524a), 2005-01-01
Supplement: b508524a.pdf [file b508524a.pdf]

**Zirconium mediated total synthesis of crinitol,  
9-hydroxyfarnesoic acid, 9-hydroxyfarnesol,  
9-hydroxysargaquinone and the selectively protected  
aglycone of moritoside and euplexide A**

**Sally Dixon, George J. Gordon and Richard J. Whitby\***

Comparison of the  $^{13}\text{C}$  NMR data of compounds **2a**, **2b** and **3** synthesised in this work with data reported for the natural products.

Comparison of  $^{13}\text{C}$  NMR data of compound **14** with the aglycone portions of the natural products moritoside (**4**) and Euplexide A (**5**).

Full data on 9-Hydroxyfarnesoic acid **1** and 9-hydroxyfarnesoic acid methyl ester.

Comparison of the  $^{13}\text{C}$  NMR data of compounds **2a** and **14** synthesised in this work with that reported for the natural product 9-hydroxyfarnesol, and the aglycone portions of the natural products moritoside (**4**) and Euplexide A (**5**).

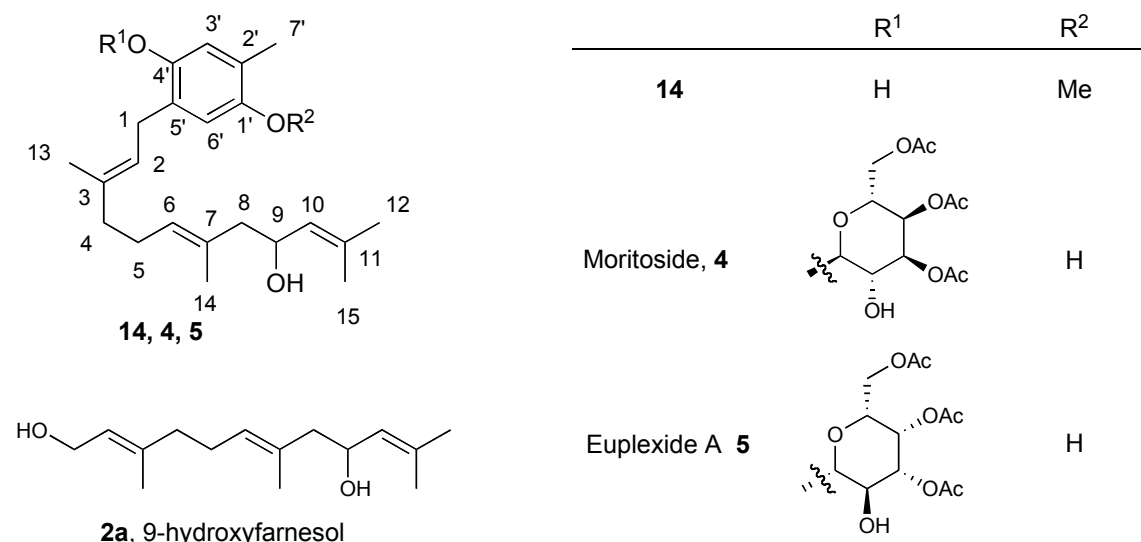

| Moritoside <b>4</b> <sup>1</sup>       | Euplexide A <b>5</b> <sup>2</sup>      | <b>14</b>                            | 9-Hydroxy-farnesol <sup>3</sup>      | <b>2a</b>                            |
|----------------------------------------|----------------------------------------|--------------------------------------|--------------------------------------|--------------------------------------|
| $\delta_{\text{C}}$ ppm <sup>a,b</sup> | $\delta_{\text{C}}$ ppm <sup>a,c</sup> | $\delta_{\text{C}}$ ppm <sup>d</sup> | $\delta_{\text{C}}$ ppm <sup>e</sup> | $\delta_{\text{C}}$ ppm <sup>d</sup> |
| 150.4 (C4')                            | 150.4 (C1')                            | 152.33                               | 138.9                                | 137.50                               |
| 148.4 (C1')                            | 148.4 (C4')                            | 148.53                               | 134.8                                | 133.68                               |
| 135.5 (C7)                             | 135.6 (C3)                             | 136.20                               | 132.2                                | 132.63                               |
| 135.1 (C3)                             | 135.2 (C11)                            | 133.90                               | 128.1                                | 128.94                               |
| 131.7 (C11)                            | 131.8 (C7)                             | 132.39                               | 127.5                                | 128.24                               |
| 130.1 (C2')                            | 130.1 (C5')                            | 128.68                               | 124.6                                | 126.34                               |
| 128.7 (C2)                             | 128.8 (C6)                             | 128.49                               | 65.5                                 | 66.08                                |
| 126.5 (C6)                             | 126.4 (C10)                            | 125.65                               | 59.2                                 | 59.29                                |
| 123.6 (C10)                            | 123.5 (C2)                             | 125.29                               | 48.2                                 | 48.69                                |
| 122.3 (C5')                            | 122.4 (C2')                            | 124.91                               | 39.2                                 | 39.47                                |
| 120.0 (C3')                            | 120.0 (C3')                            | 119.58                               | 25.9                                 | 26.14                                |
| 115.4 (C6')                            | 115.3 (C6')                            | 112.56                               | 25.7                                 | 25.74                                |
| 66.0 (C9)                              | 65.6 (C9)                              | 66.09                                | 18.1                                 | 18.13                                |
| -                                      | -                                      | 55.56 (OMe)                          | 16.2                                 | 16.26                                |
| 48.0 (C8)                              | 48.1 (C8)                              | 48.63                                | 15.9                                 | 15.73                                |
| 39.1 (C4)                              | 39.1 (C4)                              | 39.57                                |                                      |                                      |
| 28.0 (C1)                              | 27.9 (C1)                              | 30.09                                |                                      |                                      |
| 25.8 (C12)                             | 25.8 (C12)                             | 26.32                                |                                      |                                      |
| 25.3 (C5)                              | 25.3 (C5)                              | 25.76                                |                                      |                                      |
| 18.2 (C13)                             | 18.2 (C15)                             | 18.16                                |                                      |                                      |
| 16.2 (C7')                             | 16.2 (C13)                             | 16.18                                |                                      |                                      |
| 15.8 (C15)                             | 15.8 (C7')                             | 16.13                                |                                      |                                      |
| 15.6 (C14)                             | 15.5 (C14)                             | 15.89                                |                                      |                                      |

<sup>a</sup> Literature assignments for **4**<sup>1</sup> and **5**<sup>2</sup> are given, and only aglycone signals are shown. <sup>b</sup> recorded in CDCl<sub>3</sub> at 25 MHz. <sup>c</sup> recorded in CDCl<sub>3</sub> at 125 MHz. <sup>d</sup> recorded in C<sub>6</sub>D<sub>6</sub> at 100.5 MHz. <sup>e</sup> recorded in CDCl<sub>3</sub> at unspecified field.

*Comparison of the <sup>13</sup>C NMR data of compounds 2b and 3 synthesised in this work with data reported for the natural products crinitol and 9-hydroxysargaquinone.*

| Crinitol <sup>4</sup>       | 2b                          | 9-Hydroxy-sargaquinone (Rivera) <sup>5</sup> | 9-Hydroxy-sargaquinone (Numata) <sup>6</sup> | 3                           |
|-----------------------------|-----------------------------|----------------------------------------------|----------------------------------------------|-----------------------------|
| $\delta_C$ ppm <sup>a</sup> | $\delta_C$ ppm <sup>b</sup> | $\delta_C$ ppm <sup>c</sup>                  | $\delta_C$ ppm <sup>d</sup>                  | $\delta_C$ ppm <sup>b</sup> |
| 138.9                       | 139.10                      | 188.2                                        | 188.0                                        | 188.22                      |
| 138.2                       | 138.39                      | 188.1                                        | 187.9                                        | 188.16                      |
| 132.2                       | 132.40                      | 146.0                                        | 148.4                                        | 148.59                      |
| 131.6                       | 131.75                      | 146.0                                        | 146.0                                        | 146.16                      |
| 128.2                       | 128.36                      | 143.1                                        |                                              |                             |
| 127.0                       | 127.19                      | 139.5                                        | 139.6                                        | 139.78                      |
| 124.6                       | 124.76                      | 138.2                                        | 138.1                                        | 138.30                      |
| 123.9                       | 124.12                      | 133.3                                        | 133.1                                        | 133.33                      |
| 65.4                        | 65.57                       | 132.5                                        | 132.3                                        | 132.48                      |
| 59.2                        | 59.36                       | 132.0                                        | 132.1                                        | 131.97                      |
| 48.1                        | 48.26                       |                                              | 131.6                                        | 131.79                      |
| 39.5                        | 39.66                       | 127.8                                        | 127.9                                        | 128.10                      |
| 39.2                        | 39.34                       | 127.5                                        | 127.4                                        | 127.50                      |
| 26.4                        | 26.56                       | 124.2                                        | 124.0                                        | 124.22                      |
| 25.8                        | 26.01                       | 118.6                                        | 118.5                                        | 118.62                      |
| 25.6                        | 25.79                       | 66.0                                         | 65.9                                         | 66.06                       |
| 17.7                        | 17.81                       | 48.3                                         | 48.1                                         | 48.34                       |
| 16.6                        | 16.73                       | 39.7                                         | 39.6                                         | 40.37                       |
| 16.1                        | 16.30                       | 39.7                                         | 39.4                                         | 39.74                       |
| 15.9                        | 16.03                       | 27.5                                         | 27.6                                         | 27.79                       |
|                             |                             | 26.6                                         | 26.5                                         | 26.92                       |
|                             |                             | 26.6                                         | 26.4                                         | 26.64                       |
|                             |                             | 25.9                                         | 25.7                                         | 25.87                       |
|                             |                             | 17.9                                         | 17.7                                         | 17.88                       |
|                             |                             | 16.8                                         | 16.6                                         | 16.80                       |
|                             |                             | 16.4                                         | 16.3                                         | 16.63                       |
|                             |                             | 16.4                                         | 16.0                                         | 16.46                       |
|                             |                             | 16.2                                         | 16.0                                         | 16.23                       |

<sup>a</sup> recorded in CDCl<sub>3</sub> at unspecified field.

<sup>b</sup> recorded in CDCl<sub>3</sub> at 100.5 MHz.

<sup>c</sup> recorded in CDCl<sub>3</sub> at 50 MHz.

<sup>d</sup> recorded in CDCl<sub>3</sub> at 75 MHz.

*9-Hydroxyfarnesoic acid 1 and 9-hydroxy-farnesoic acid methyl ester.*

Although the isolation of 9-hydroxyfarnesoic from a natural source has been reported, no physical data was given.<sup>7</sup> Proton NMR data (with unspecified field and solvent), IR, and MS data were give for 9-hydroxy-farnesoic acid methyl ester. We report below our data for these two compounds.

9-Hydroxyfarnesoic acid **1**:

<sup>1</sup>H NMR (300 MHz, C<sub>6</sub>D<sub>6</sub>): <sup>TM</sup> = 5.80 (1H, s(br)), 5.27 (1H, dseptet, J = 8.5, 1.1 Hz), 5.08 (1H, t, J = 5.9 Hz), 4.53 (1H, ddd, J = 8.5, 7.4, 5.6 Hz), 2.35 (1H, dd, J = 13.2, 7.4 Hz), 2.16 (1H, dd, J = 13.2, 5.5 Hz), 2.07 (3H, s(br)), 2.01-1.82 (4H, m), 1.58 (6H, s), 1.51 (3H, s(fine splitting)), 1.37 (1H, s, -OH).

<sup>13</sup>C NMR (75 MHz, C<sub>6</sub>D<sub>6</sub>): <sup>TM</sup> = 133.20 (s), 131.98 (s), 130.16 (d), 128.35 (d), 126.14 (d), 125.76 (s), 69.38 (d), 49.22 (t), 41.17 (t), 30.47 (t), 25.68 (q), 19.09 (q), 18.19 (q), 16.96 (q).

HRMS (EI): C<sub>15</sub>H<sub>22</sub>O<sub>2</sub> requires m/z = 234.1619. Found 234.1626.

(*2E*, *6E*)-Methyl-9-hydroxy-3,7,11-trimethyldodeca-2,6,10-trienoate ( 9-hydroxy-farnesoic acid methyl ester):

<sup>1</sup>H NMR (400 MHz, C<sub>6</sub>D<sub>6</sub>): <sup>TM</sup> = 5.68 (1H, s), 5.13 (1H, d, J = 8.3 Hz), 4.94 (1H, t, J = 6.9 Hz), 4.29 (1H, apparent q, J = 5.5 Hz), 3.31 (3H, s), 2.09 (1H, dd, J = 13.3, 8.0 Hz), 2.03 (3H, s), 1.99 (1H, dd, J = 13.3, 5.0 Hz), 1.81 (2H, apparent q, J = 6.9 Hz), 1.71 (2H, t, J = 6.8 Hz), 1.47 (3H, s), 1.40 (3H, s), 1.37 (3H, s).

<sup>13</sup>C NMR (100.5 MHz, C<sub>6</sub>D<sub>6</sub>): <sup>TM</sup> = 166.59 (s), 159.23 (s), 133.31 (s), 132.99 (s), 129.02 (d), 126.51 (d), 115.79 (d), 66.43 (d), 50.24 (q), 48.36 (t), 40.49 (t), 25.94 (t), 25.50 (q), 18.50 (q), 17.90 (q), 16.16 (q).

IR (thin film) cm<sup>-1</sup> = 1721.7, 1650.8 cm<sup>-1</sup> (lit.<sup>7</sup> 1720, 1650 cm<sup>-1</sup>).

LRMS (EI) m/z = 248 (M-H<sub>2</sub>O)<sup>+</sup> (10%), 135 (78%), 93 (100%).

*References*

1. N. Fusetani, K. Yasukawa, S. Matsunaga and K. Hashimoto, *Tetrahedron Lett.*, 1985, **26**, 6449.
2. J. Shin, Y. Seo, K. W. Cho, S. S. Moon and Y. J. Cho, *J. Org. Chem.*, 1999, **64**, 1853.
3. L. T. Burka, L. J. Felice and S. W. Jackson, *Phytochemistry*, 1981, **20**, 647.
4. I. Kubo, T. Matsumoto and N. Ichikawa, *Chem. Lett.*, 1985, 249.
5. P. Rivera, F. Podesta, M. Norte, F. Cataldo and A. G. Gonzalez, *Can. J. Chem.*, 1990, **68**, 1399.
6. A. Numata, S. Kanbara, C. Takahashi, R. Rujiki, M. Yoneda, Y. Usami and E. Fujita, *Phytochemistry*, 1992, **31**, 1209.
7. J. A. Schneider, J. Lee, Y. Naya, K. Nakanishi, K. Oba and I. Uritani, *Phytochemistry*, 1984, **23**, 759.
